# Supplementary material
Source: PubMed Central journal article supplement (PMC5943248)
Supplement: 41418_2017_35_MOESM1_ESM.pdf [file 41418_2017_35_MOESM1_ESM.pdf]

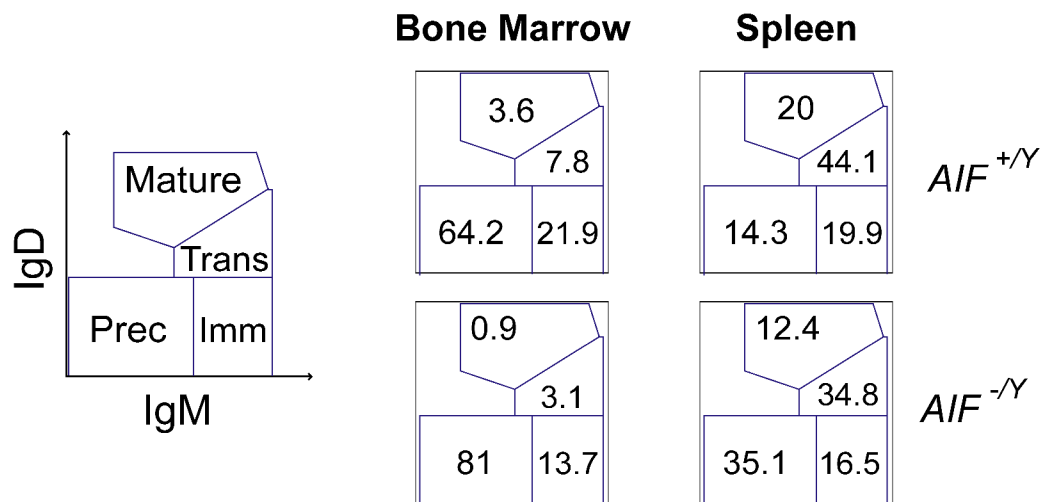

**Supplementary Table 1. *AIF<sup>-Y</sup>* mice presented increased frequencies of precursor B-cells in BM and spleen.** *Left*, Gating strategy. *Right*, Representative results of a IgD/IgM staining performed in B220-expressing BM and spleen cells from 21-day-old *AIF<sup>+Y</sup>* and *AIF<sup>-Y</sup>* animals. The percentages of mature (IgM+IgD+), transitional (Trans, IgM+IgDint), immature (Imm, IgM+IgD-), and precursor (Prec, IgM-IgD-) B-cells are shown. These data are depicted in Figure 1g.
