# Supplementary material
Source: PubMed Central journal article supplement (PMC5943248)
Supplement: 41418_2017_35_MOESM2_ESM.pdf [file 41418_2017_35_MOESM2_ESM.pdf]

| Pathways                                           | Total | Expected | Hits | Raw p    | Holm p   | FDR      | Impact      |
|----------------------------------------------------|-------|----------|------|----------|----------|----------|-------------|
| Aminoacyl-tRNA biosynthesis                        | 69    | 0.88     | 11   | 3.98E-11 | 3.26E-09 | 3.26E-09 | 0.00        |
| <b>Arginine and proline metabolism</b>             | 44    | 0.56     | 5    | 1.45E-04 | 1.18E-02 | 5.96E-03 | <b>0.32</b> |
| <b>Valine, leucine and isoleucine biosynthesis</b> | 11    | 0.14     | 3    | 2.67E-04 | 2.14E-02 | 7.30E-03 | <b>1.00</b> |
| <b>Alanine, aspartate and glutamate metabolism</b> | 24    | 0.30     | 3    | 2.95E-03 | 2.33E-01 | 6.05E-02 | <b>0.15</b> |
| Nitrogen metabolism                                | 9     | 0.11     | 2    | 5.21E-03 | 4.06E-01 | 8.54E-02 | 0.00        |
| Valine, leucine and isoleucine degradation         | 38    | 0.48     | 3    | 1.10E-02 | 8.47E-01 | 1.50E-01 | 0.00        |
| Glutathione metabolism                             | 26    | 0.33     | 2    | 4.14E-02 | 1.00E+00 | 4.24E-01 | 0.01        |
| <b>Galactose metabolism</b>                        | 26    | 0.33     | 2    | 4.14E-02 | 1.00E+00 | 4.24E-01 | <b>0.04</b> |
| <b>Glycine, serine and threonine metabolism</b>    | 31    | 0.39     | 2    | 5.70E-02 | 1.00E+00 | 5.08E-01 | <b>0.27</b> |
| D-Glutamine and D-glutamate metabolism             | 5     | 0.06     | 1    | 6.20E-02 | 1.00E+00 | 5.08E-01 | 0.00        |
| Cyanoamino acid metabolism                         | 6     | 0.08     | 1    | 7.40E-02 | 1.00E+00 | 5.51E-01 | 0.00        |
| Methane metabolism                                 | 9     | 0.11     | 1    | 1.09E-01 | 1.00E+00 | 7.45E-01 | 0.00        |
| Selenoamino acid metabolism                        | 15    | 0.19     | 1    | 1.75E-01 | 1.00E+00 | 1.00E+00 | 0.00        |
| Pantothenate and CoA biosynthesis                  | 15    | 0.19     | 1    | 1.75E-01 | 1.00E+00 | 1.00E+00 | 0.00        |
| Glyoxylate and dicarboxylate metabolism            | 18    | 0.23     | 1    | 2.07E-01 | 1.00E+00 | 1.00E+00 | 0.00        |
| <b>Starch and sucrose metabolism</b>               | 19    | 0.24     | 1    | 2.17E-01 | 1.00E+00 | 1.00E+00 | <b>0.04</b> |
| <b>Citrate cycle (TCA cycle)</b>                   | 20    | 0.25     | 1    | 2.27E-01 | 1.00E+00 | 1.00E+00 | <b>0.05</b> |
| <b>Fructose and mannose metabolism</b>             | 21    | 0.27     | 1    | 2.37E-01 | 1.00E+00 | 1.00E+00 | <b>0.13</b> |
| Pyruvate metabolism                                | 23    | 0.29     | 1    | 2.56E-01 | 1.00E+00 | 1.00E+00 | 0.00        |
| Porphyryn and chlorophyll metabolism               | 27    | 0.34     | 1    | 2.94E-01 | 1.00E+00 | 1.00E+00 | 0.00        |
| <b>Cysteine and methionine metabolism</b>          | 27    | 0.34     | 1    | 2.94E-01 | 1.00E+00 | 1.00E+00 | <b>0.09</b> |
| Glycerophospholipid metabolism                     | 30    | 0.38     | 1    | 3.21E-01 | 1.00E+00 | 1.00E+00 | 0.00        |
| Pyrimidine metabolism                              | 41    | 0.52     | 1    | 4.12E-01 | 1.00E+00 | 1.00E+00 | 0.00        |
| Tyrosine metabolism                                | 44    | 0.56     | 1    | 4.35E-01 | 1.00E+00 | 1.00E+00 | 0.03        |
| Primary bile acid biosynthesis                     | 46    | 0.58     | 1    | 4.50E-01 | 1.00E+00 | 1.00E+00 | 0.03        |
| Purine metabolism                                  | 68    | 0.86     | 1    | 5.90E-01 | 1.00E+00 | 1.00E+00 | 0.00        |

**Supplementary Table 2. AIF loss-mediated OXPHOS dysfunction induced metabolic adjustments in BM cells.** Detailed results obtained in broad metabolic assessments of BM cells from 21-day-old AIF<sup>+Y</sup> and AIF<sup>-Y</sup> mice analyzed using the Metabolomics pathway (MetPA) software (freely available at <http://metpa.metabolomics.ca>). The data are expressed as the results recorded in the AIF<sup>-Y</sup> cells compared to AIF<sup>+Y</sup> cells. Statistical p values are as follows: (i) Total is the total number of compounds in a pathway; (ii) Hits represent the matched number from user uploaded data; (iii) Raw p is the original p-value calculated from the enrichment analysis; (iv) Holm p represents the p-value adjusted using the Holm-Bonferroni method; (v) FDR is the p-value adjusted using the False Discovery Rate; and (vi) Impact depicts the pathway impact value calculated based on a pathway topology analysis. In terms of impact, the metabolic pathways altered by the loss of AIF are shown in bold.
