# Supplementary material
Source: PubMed Central journal article supplement (PMC5943248)
Supplement: 41418_2017_35_MOESM4_ESM.pdf [file 41418_2017_35_MOESM4_ESM.pdf]

**a**

|        | CD     | CD NAC  |
|--------|--------|---------|
| WT     | 17,467 | 13,584  |
| AIF KO | 6,547  | 4,187   |
|        | HFD    | HFD NAC |
| WT     | 13,212 | 17,815  |
| AIF KO | 8,001  | 23,798  |

**b**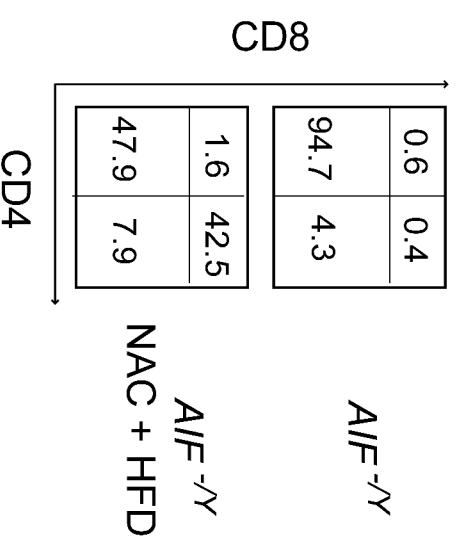

**Supplementary Table 4. High fat diet and antioxidant combined treatments restored ATP levels and thymopoiesis in AIF<sup>-/-</sup> mice.**

**(a)** Representative ATP levels recorded in WT and AIF KO thymocytes from 21-day-old newborns from dams fed with control diet (CD) or high-fat diet (HFD) and supplied or not with NAC in drinking water (n = 9 animals per group). **(b)** Typical percentages of a CD4/CD8 labeling measured in AIF<sup>-/-</sup> thymocytes purified from mice animals fed with a control diet (AIF<sup>-/-</sup>) or with a HFD supplied with NAC (AIF<sup>-/-</sup> NAC + HFD). These data are represented in the histograms included in the Figures 7e and f.
