# Supplementary material
Source: PubMed Central journal article supplement (PMC5943248)
Supplement: 41418_2017_35_MOESM5_ESM.pdf [file 41418_2017_35_MOESM5_ESM.pdf]

**a**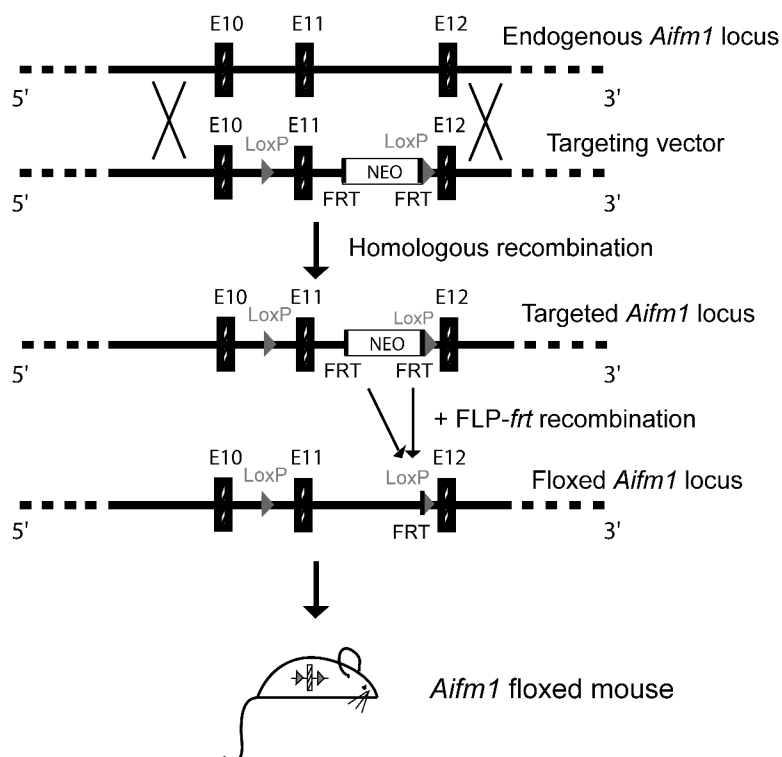**b**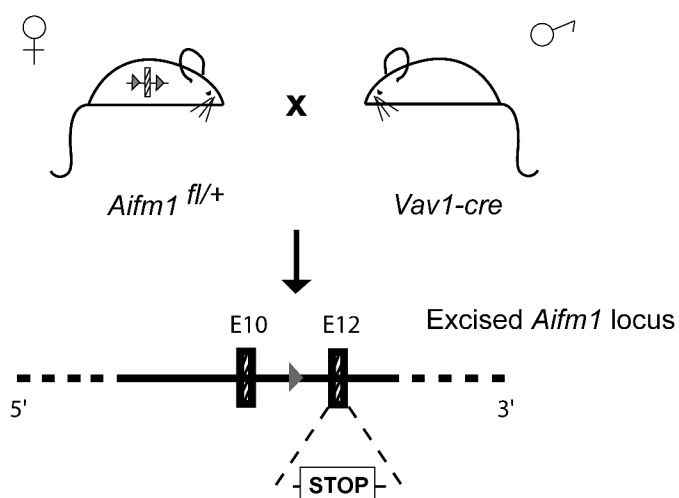**c**

*Aifm1*<sup>fl/+</sup> x *Vav1-cre*:

| (Among males) | <i>AIF</i> <sup>+/<i>Y</i></sup> | <i>AIF</i> <sup>-/<i>Y</i></sup> |
|---------------|----------------------------------|----------------------------------|
| Expected      | 563 (50%)                        | 563 (50%)                        |
| Observed      | 592 (53%)                        | 534 (47%)                        |

**d**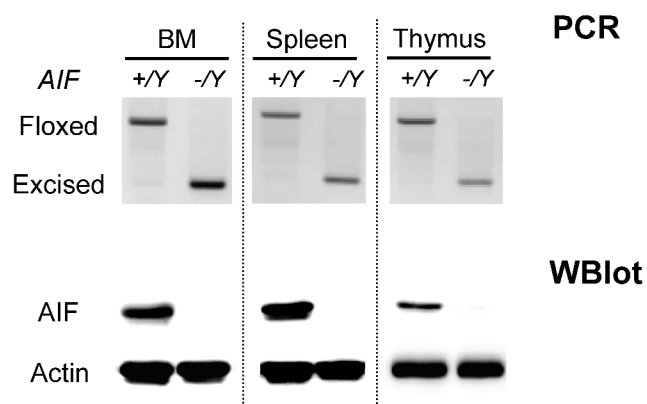

**Supplementary Figure 1. Generation of a hematopoietic cell-specific *AIF*<sup>-/*Y*</sup> mouse strain.** (a) Schematic representation of the wild-type *Aifm1* allele (top), targeting vector (middle), the targeted *Aifm1* locus, and the resulting floxed *Aifm1* locus. The targeting vector was generated by classical recombination. Briefly, exon 11 of *Aifm1* was flanked by LoxP sequences in direct orientation along with a NEO cassette used for selection. Then, Sv129 ES cells were electroporated with this vector, transfected with a plasmid containing FLP recombinase to eliminate the NEO cassette and, after selecting positive clones, injected into C57BL/6J blastocysts to obtain the chimeric mice. (b) After at least fifteen backcrosses to the C57BL/6J background, heterozygous *Aifm1*-floxed females (*Aifm1*<sup>fl/+</sup>) were crossed to C57BL/6J *Vav1-cre* males. This crossing induced the excision of exon 11 in *Aifm1* that resulted in a frameshift mutation and the creation of a stop codon in exon 12. (c) Generation of male offspring from crosses of *Aifm1*<sup>fl/+</sup> females with C57BL/6J *Vav1-cre* males (Observed) compared with the theoretical Mendelian distribution (Expected). (d) Genomic PCR assessment of exon 11 of the *Aifm1* locus in BM cells, splenocytes, and thymocytes from *AIF*<sup>+/*Y*</sup> and *AIF*<sup>-/*Y*</sup> neonate mice. AIF immunoblotting confirmed total AIF ablation.
