# Supplementary material
Source: PubMed Central journal article supplement (PMC5943248)
Supplement: 41418_2017_35_MOESM6_ESM.pdf [file 41418_2017_35_MOESM6_ESM.pdf]

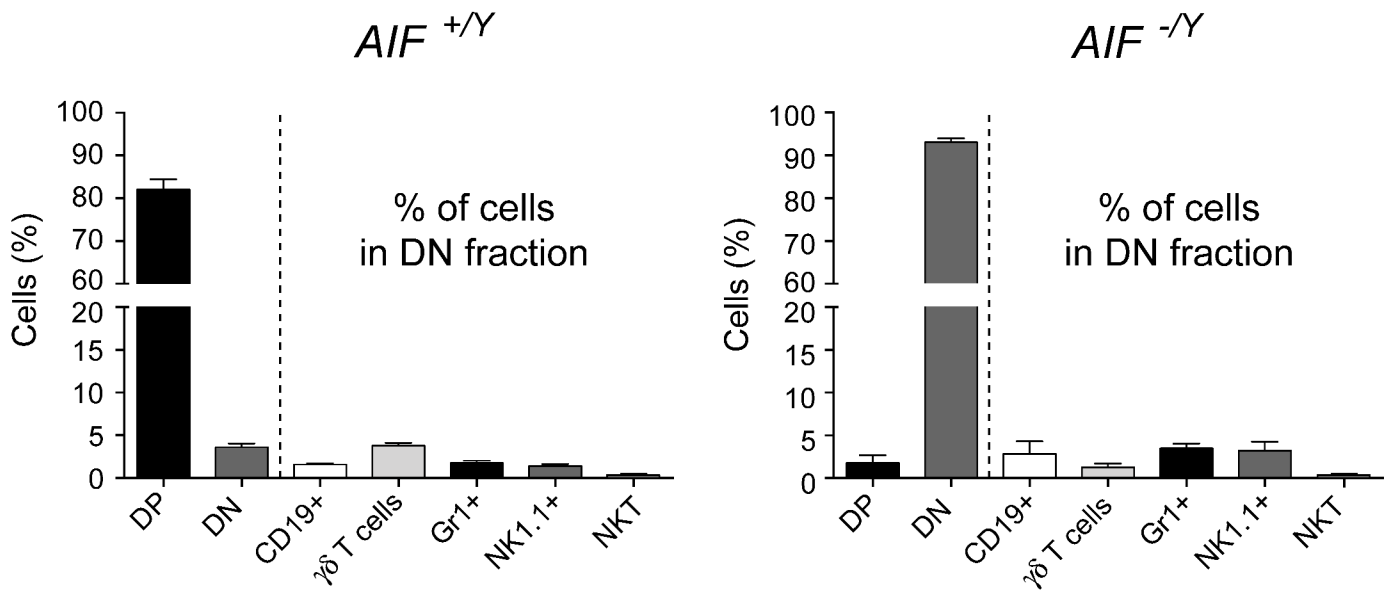

**Supplementary Figure 2. Percentage of B cells, myeloid cells,  $\gamma\delta$  T cells, NK cells, NK T cells that are present in the DN thymocyte fraction purified from *AIF*<sup>+/ $\gamma$</sup>  and *AIF*<sup>-/ $\gamma$</sup>  animals.** The percentages of DP and DN cells were assessed in 21-day-old *AIF*<sup>+/ $\gamma$</sup>  and *AIF*<sup>-/ $\gamma$</sup>  mice by a double CD4/CD8 labeling. Then, in the DN fractions, the percentages of B cells (CD19<sup>+</sup>),  $\gamma\delta$  T cells ( $\gamma\delta$ <sup>+</sup>), Myeloid cells (Gr1<sup>+</sup>), NK cells (NK1.1<sup>+</sup>) and NKT cells (NK1.1<sup>+</sup> CD3<sup>+</sup>) were measured and expressed as a histogram (n = 5 animals per group). Statistical significance was calculated by Mann Whitney test. Bars represent mean  $\pm$  SEM.
