# Supplementary material
Source: PubMed Central journal article supplement (PMC5943248)
Supplement: 41418_2017_35_MOESM7_ESM.pdf [file 41418_2017_35_MOESM7_ESM.pdf]

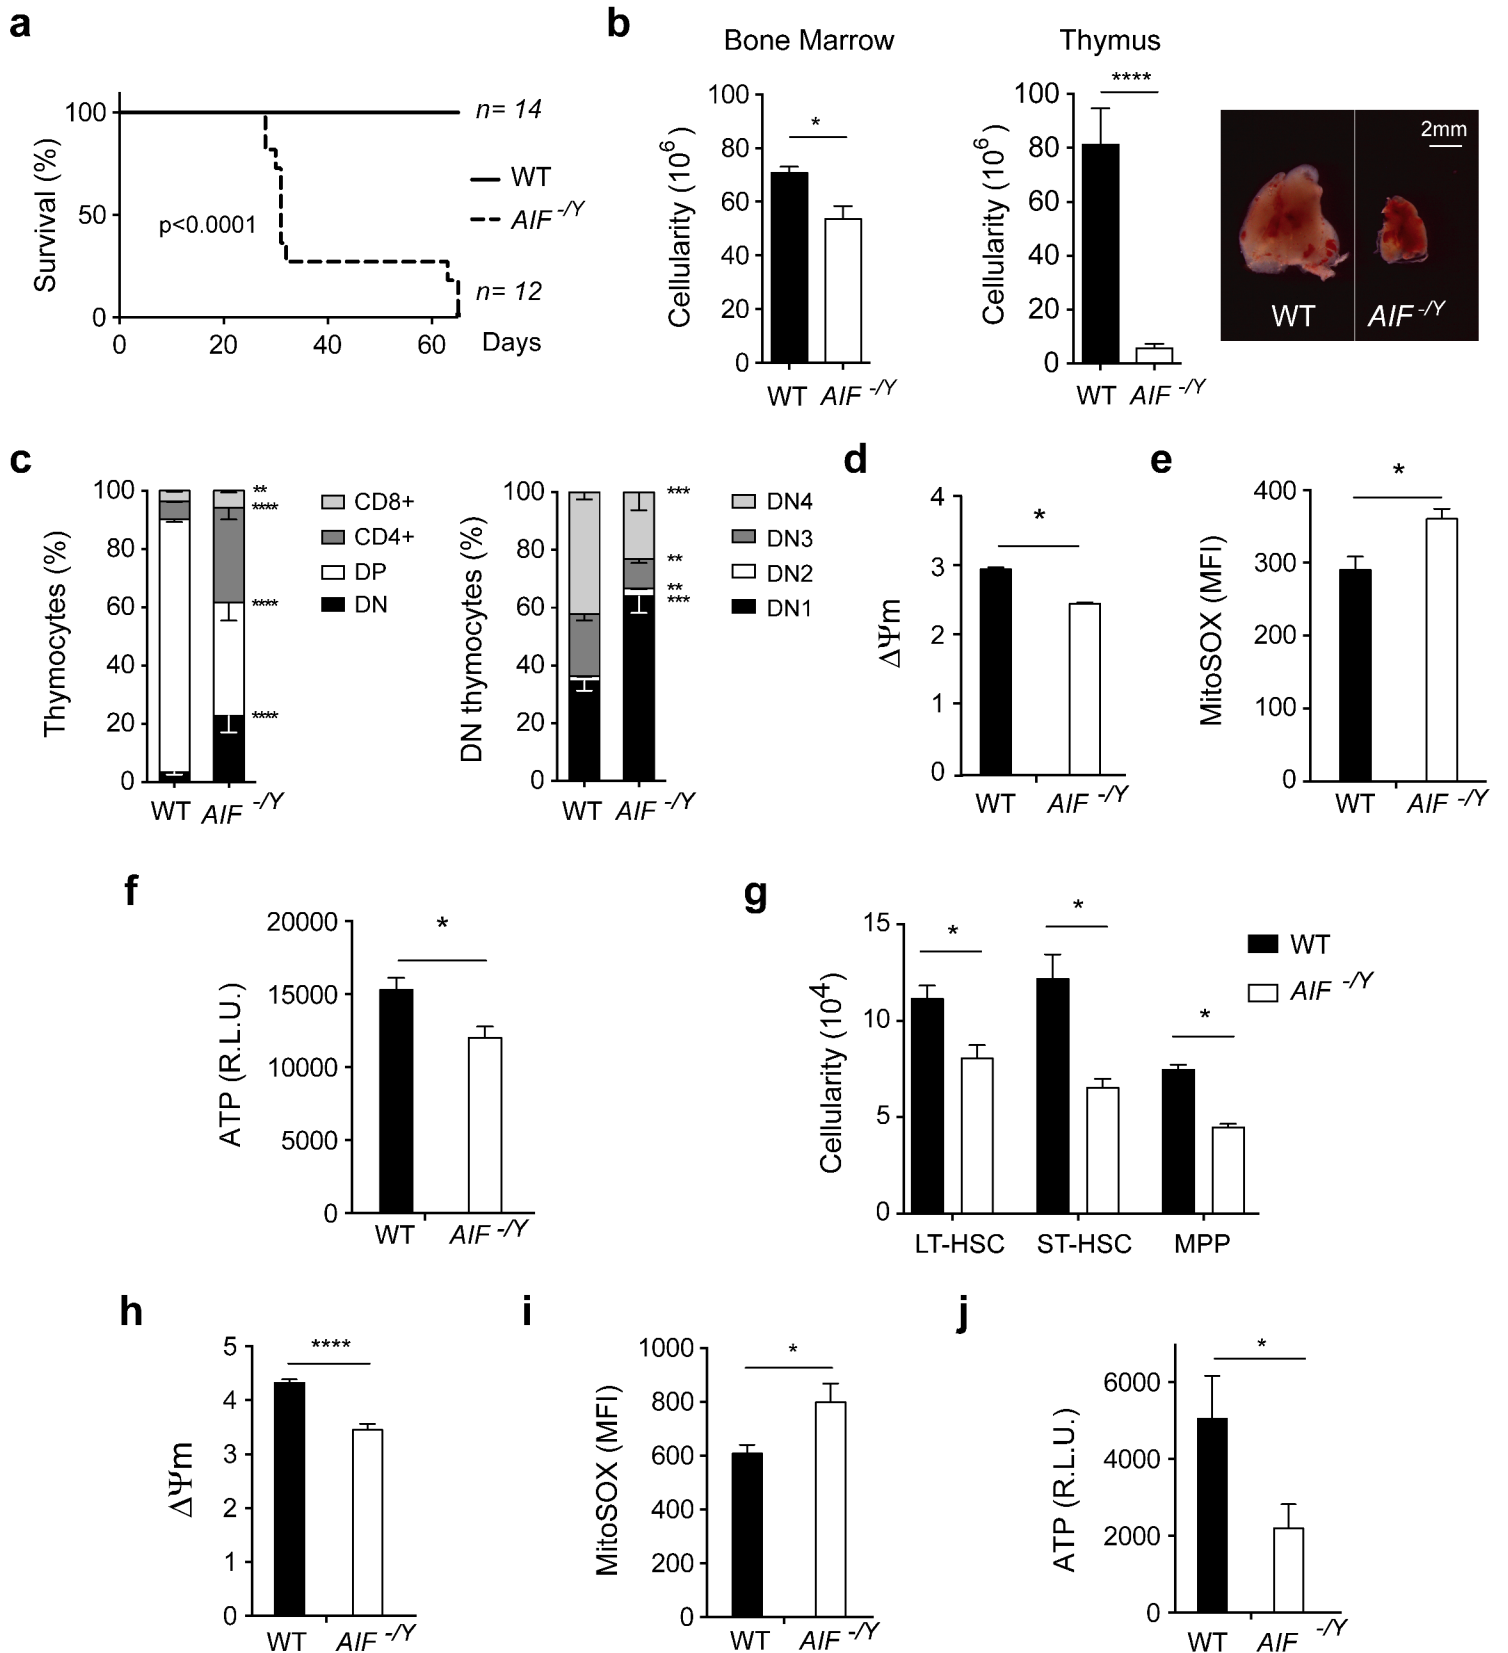

**Supplementary Figure 3. AIF loss provoked hematopoietic defaults in adult mice.** (a) Kaplan-Meier survival probability of WT and *AIF*<sup>-/-</sup> tamoxifen-treated mice. (b) Cellularity assessed in BM and thymus from WT and *AIF*<sup>-/-</sup> mice (n = 8 animals per group). Representative images of a thymus from control and *AIF*<sup>-/-</sup> mice are shown. (c) Left, percentages of CD4-/CD8- (DN), CD4+/CD8+ (DP), CD4+, and CD8+ thymocytes in WT and *AIF*<sup>-/-</sup> tamoxifen-treated mice (n = 12 animals per group). Right, frequencies of DN1-DN4 thymocytes from WT and *AIF*<sup>-/-</sup> tamoxifen-treated animals (n = 12 mice per group). (d)  $\Delta\Psi_m$  assessment performed in BM cells from WT and *AIF*<sup>-/-</sup> tamoxifen-treated mice (n = 12 animals per group). (e) Mitochondrial ROS levels recorded in BM cells obtained from WT and *AIF*<sup>-/-</sup> tamoxifen-treated animals (n = 9 mice per group). (f) ATP levels recorded in BM cells obtained from WT and *AIF*<sup>-/-</sup> tamoxifen-treated animals (n = 6 mice per group). (g) The number of LT-HSC, ST-HSC, and MPP assessed in WT and *AIF*<sup>-/-</sup> mice (n = 7 animals per group). (h)  $\Delta\Psi_m$  assessment performed in thymocytes from WT and *AIF*<sup>-/-</sup> tamoxifen-treated mice (n = 9 animals per group). (i) Mitochondrial ROS levels recorded in thymocytes obtained from WT and *AIF*<sup>-/-</sup> tamoxifen-treated animals (n = 9 mice per group). (j) ATP levels recorded in thymocytes obtained from WT and *AIF*<sup>-/-</sup> tamoxifen-treated animals (n = 6 mice per group). Statistical significance was calculated by Mann Whitney test in samples obtained from mice 28 days after the first tamoxifen injection. Bars represent mean  $\pm$  SEM. *Aifm1*<sup>fl/y</sup>; *Rosa26-CreERT2*-tamoxifen-injected mice were used as control (WT) animals.
