# Supplementary material
Source: PubMed Central journal article supplement (PMC5943248)
Supplement: 41418_2017_35_MOESM8_ESM.pdf [file 41418_2017_35_MOESM8_ESM.pdf]

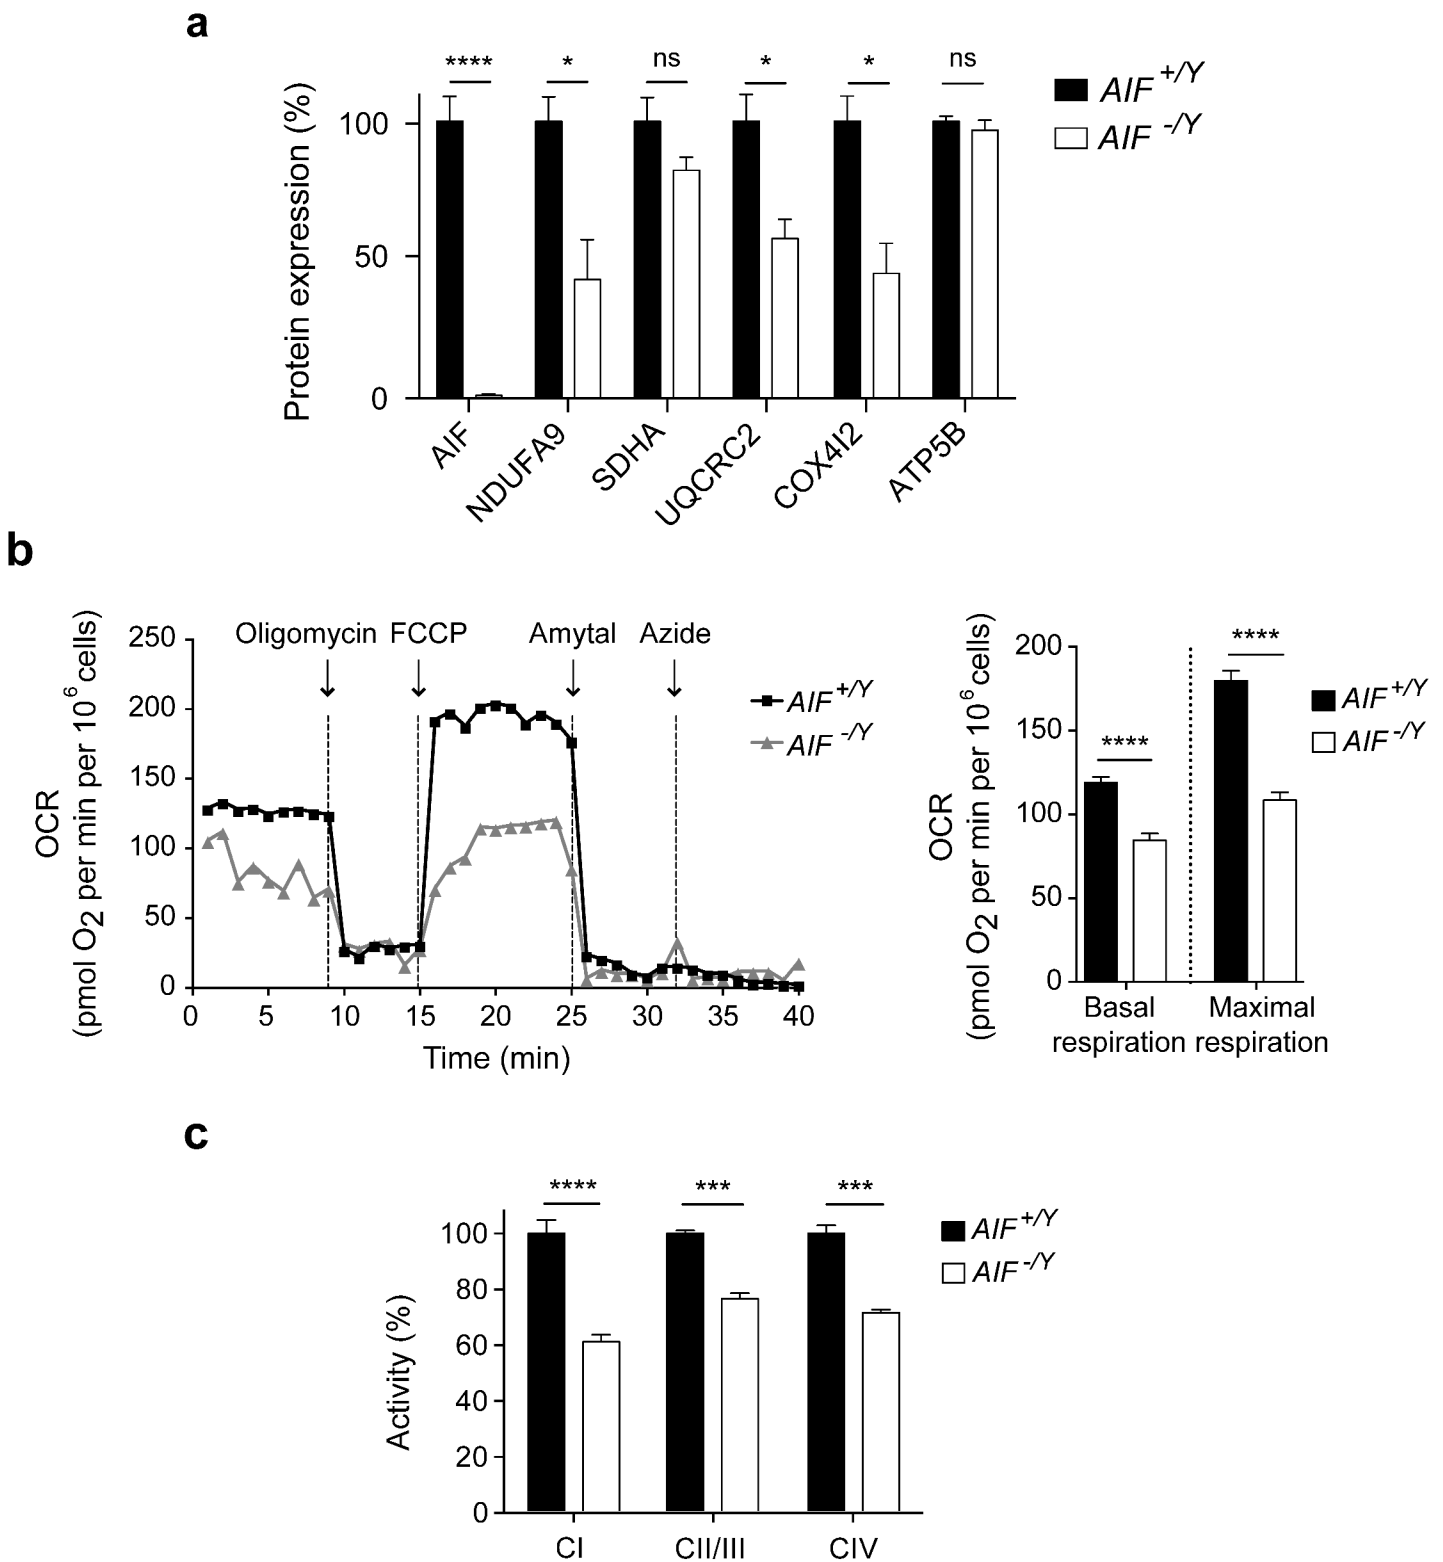

**Supplementary Figure 4. AIF deficiency induced loss of ETC integrity and OXPHOS dysfunction.** (a) AIF, NDUFA9, SDHA, UQCRC2, COX4I2, and ATP5B protein expression, verified by immunoblotting in **Figure 2a**, was quantified as indicated in the Materials and Methods section. Data are expressed as a percentage relative to the mean of the OD obtained in the AIF<sup>+Y</sup> BM samples (100 %). (b) *Left*, Clark electrode OCR curve representing basal oxygen respiration (initial rates) of AIF<sup>+Y</sup> or AIF<sup>-Y</sup> BM cells and cell response to oligomycin, FCCP, amytal, and azide sequential addition. Arrows indicate the time of the addition of each substrate. *Right*, Basal and maximal oxygen consumption rates in BM cells from AIF<sup>+Y</sup> or AIF<sup>-Y</sup> animals (n = 5 independent experiments). (c) Complex I (Malate + Glutamate), II/III (Succinate), and IV (TM PD + Ascorbate)-driven OCR of permeabilized AIF<sup>+Y</sup> or AIF<sup>-Y</sup> BM cells measured by Seahorse. Data obtained in AIF<sup>-Y</sup> cells are expressed as a percentage of the activity recorded in AIF<sup>+Y</sup> cells (100 %) (n = 8 from 2 independent experiments). Statistical significance was calculated by *t*-student (a) or Mann Whitney (b and c) tests. Bars represent mean ± SEM.
