# Supplementary material
Source: PubMed Central journal article supplement (PMC5943248)
Supplement: 41418_2017_35_MOESM9_ESM.pdf [file 41418_2017_35_MOESM9_ESM.pdf]

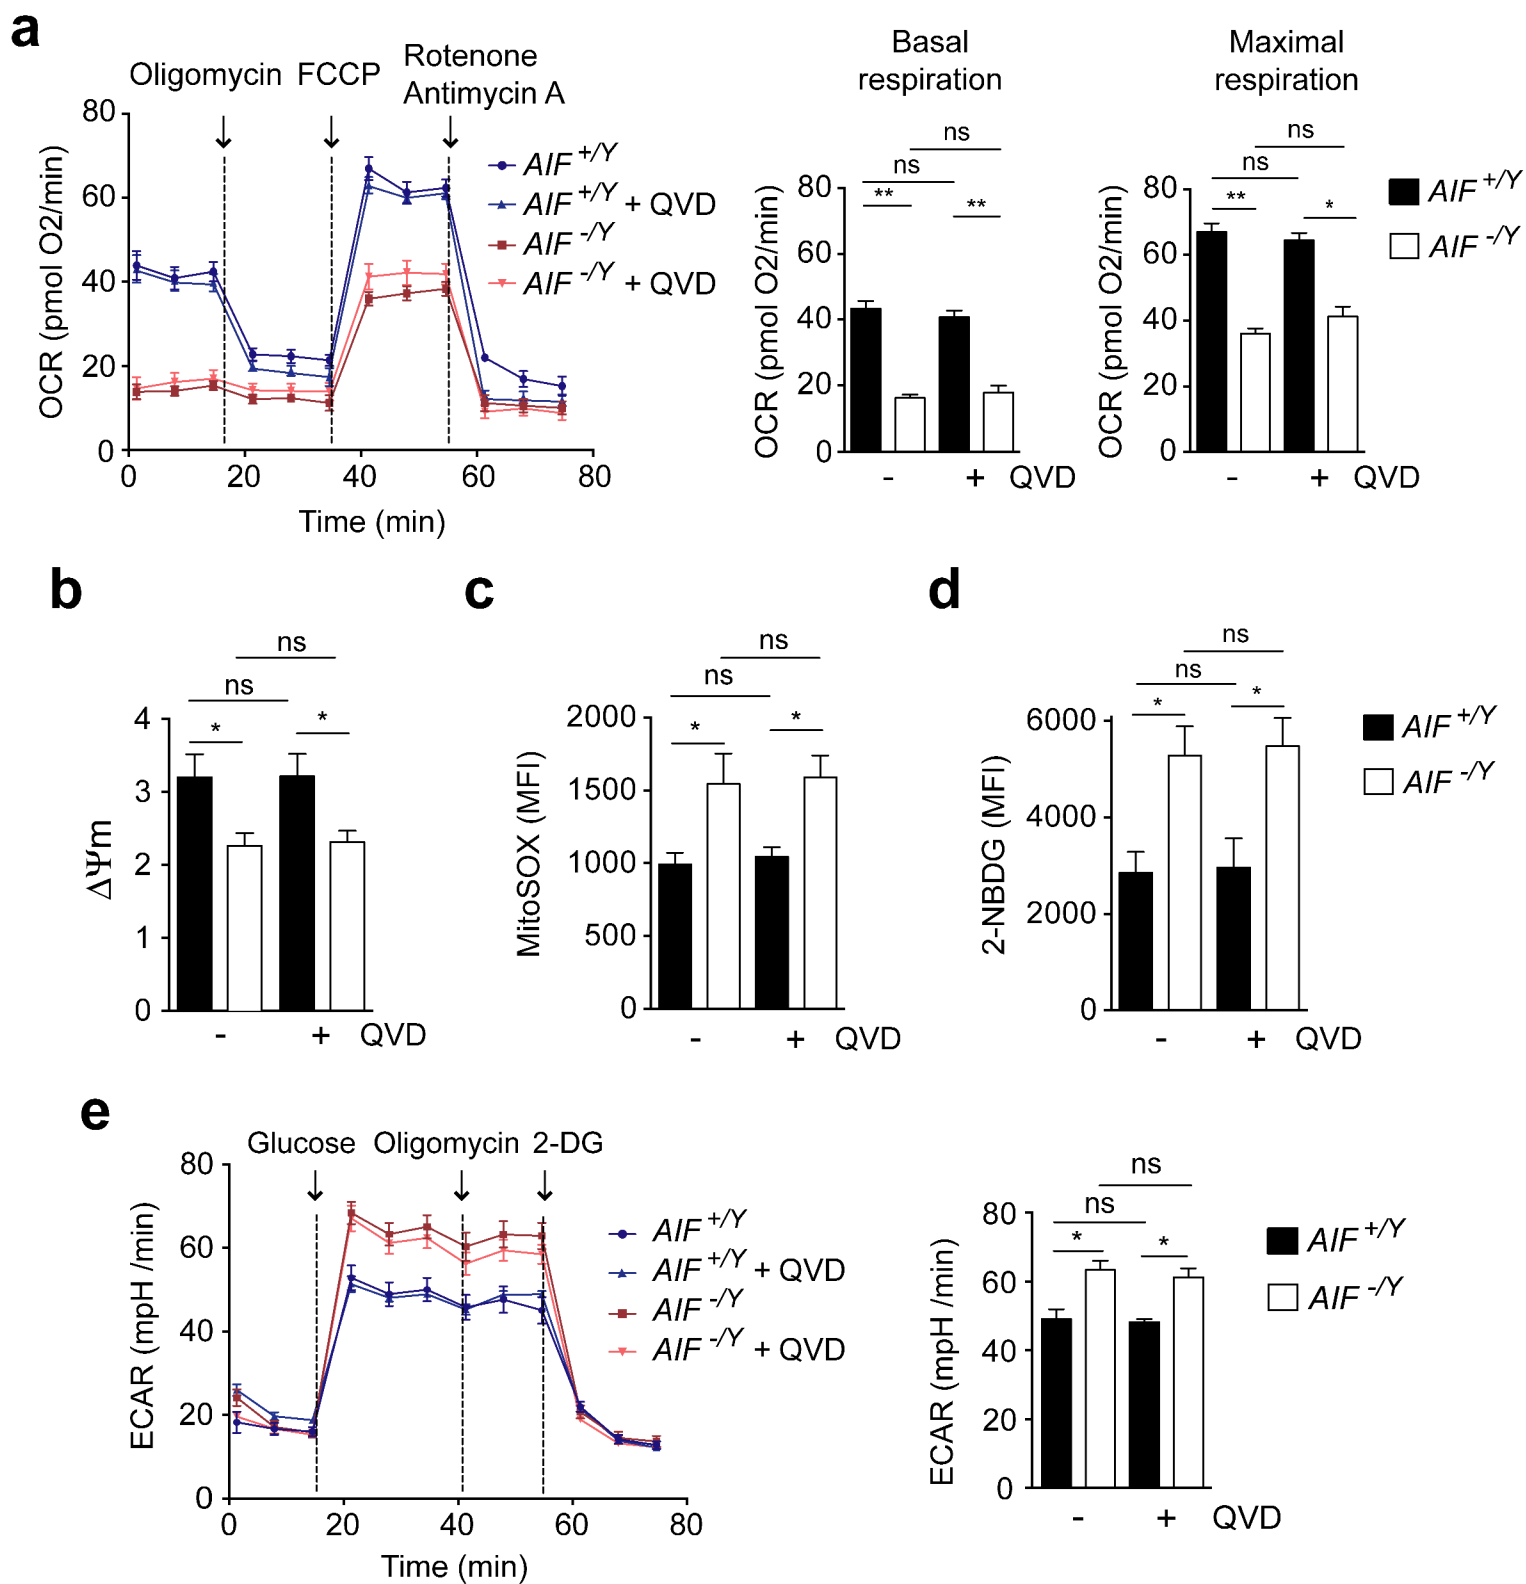

**Supplementary Figure 5. The metabolic changes associated to AIF deficiency in BM cells are caspase-independent.** (a) *Left*, Representative Seahorse OCR assessment of *AIF*<sup>+Y</sup> and *AIF*<sup>-Y</sup> BM cells pretreated or not during 30 min with the caspase inhibitor Q-VD-OPh (QVD, 1  $\mu$ M) under basal conditions (initial rates) and in response to sequential treatment with Oligomycin, FCCP, and Rotenone/Antimycin A. Arrows indicate the time of the addition of each reagent. *Right*, Basal and maximal OCR of BM cells  $\pm$  QVD expressed as a histogram ( $n = 3$  independent experiments). (b)  $\Delta\Psi_m$  assessment performed in *AIF*<sup>+Y</sup> and *AIF*<sup>-Y</sup> BM cells  $\pm$  QVD ( $n = 6$  mice per group). (c) Mitochondrial ROS levels recorded in *AIF*<sup>+Y</sup> and *AIF*<sup>-Y</sup> BM cells  $\pm$  QVD ( $n = 6$  mice per group). (d) Glucose uptake measured by the assimilation of 2-NBDG in *AIF*<sup>+Y</sup> and *AIF*<sup>-Y</sup> BM cells  $\pm$  QVD ( $n = 5$  mice per group). (e) Representative ECAR of *AIF*<sup>+Y</sup> and *AIF*<sup>-Y</sup> BM cells  $\pm$  QVD measured in response to sequential addition of Glucose, Oligomycin, and 2-deoxyglucose (2-DG). Arrows indicate the time of the addition of each reagent. *Right*, ECAR of BM cells  $\pm$  QVD after Glucose treatment expressed as a histogram ( $n = 3$  independent experiments). Statistical significance was calculated by Mann Whitney test. Bars represent mean  $\pm$  SEM. All tests were performed in BM cells from 21-day-old animals.
