# Supplementary material
Source: PubMed Central journal article supplement (PMC5943248)
Supplement: 41418_2017_35_MOESM10_ESM.pdf [file 41418_2017_35_MOESM10_ESM.pdf]

**a**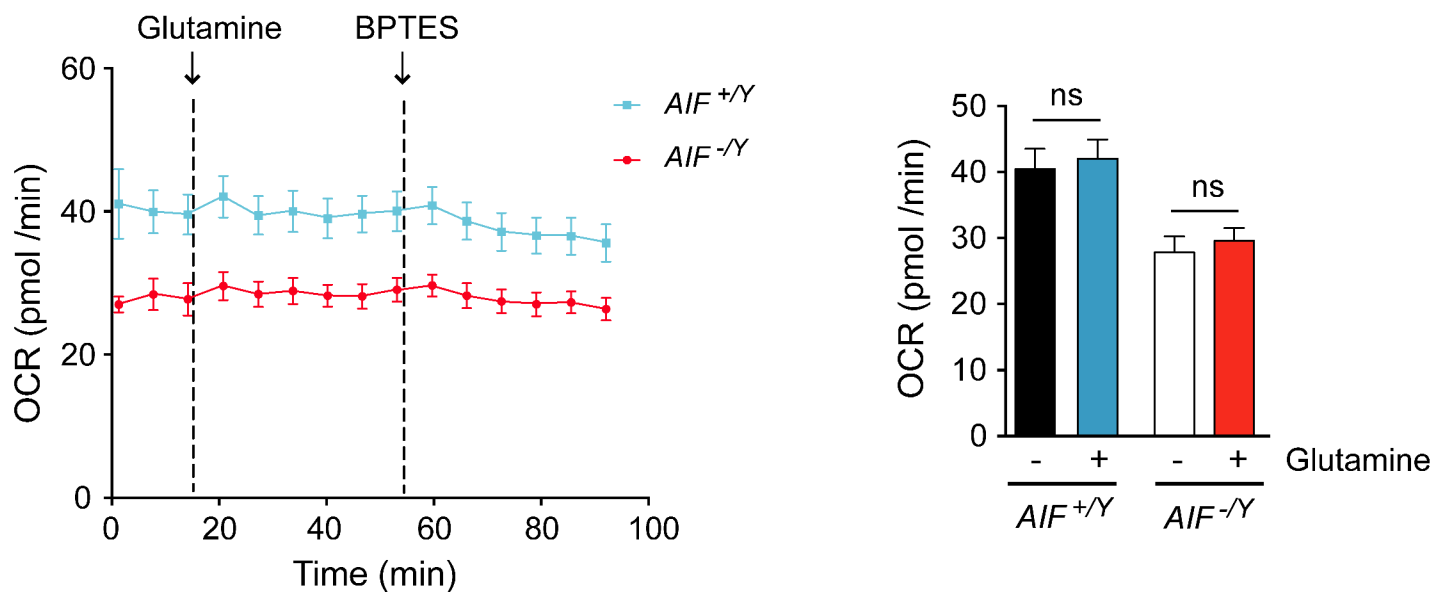**b**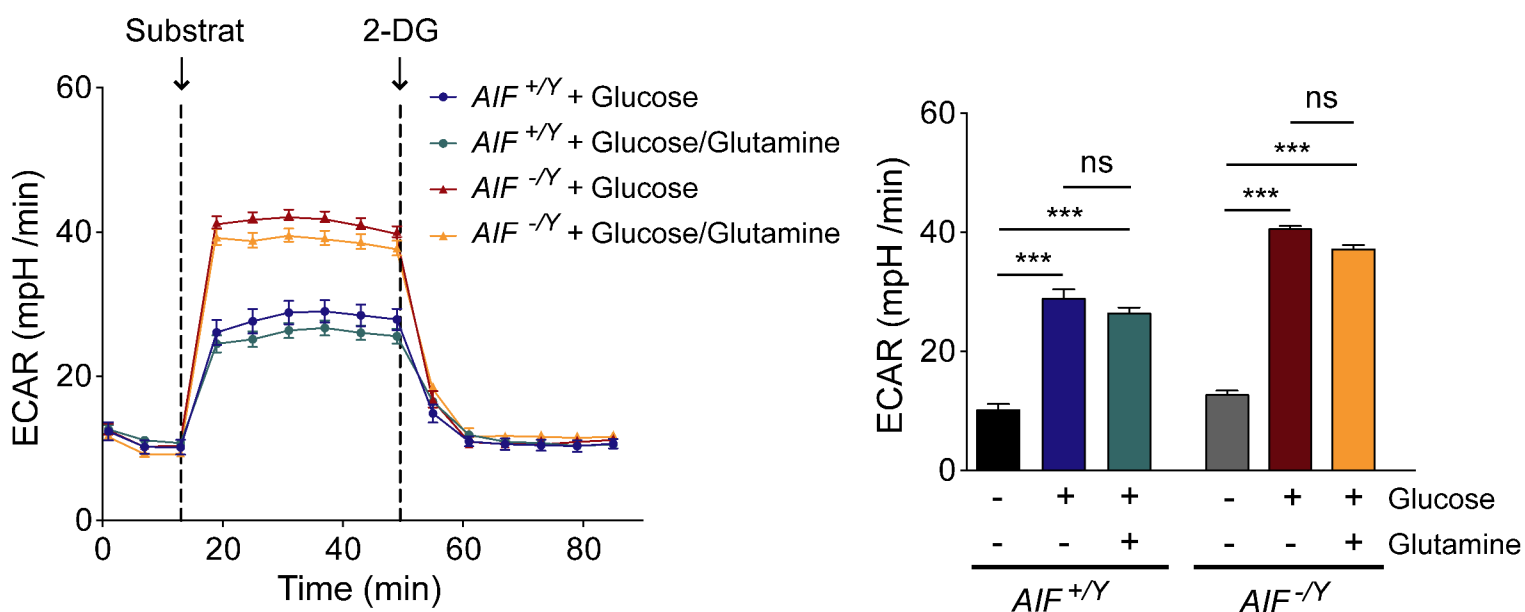

**Supplementary Figure 6. *AIF*<sup>-Y</sup> BM cells do not use glutaminolysis as a source of energy.**

(a) *Left*, Representative Seahorse OCR assessment of *AIF*<sup>+Y</sup> and *AIF*<sup>-Y</sup> BM cells from 21-day-old animals under basal conditions (initial rates) and in response to the sequential treatment with Glutamine and BPTES (a selective inhibitor of Glutaminase). Arrows indicate the time of the addition of each reagent. Note the absence of response to the treatments (OCR increase or inhibition). *Right*, OCR of *AIF*<sup>+Y</sup> and *AIF*<sup>-Y</sup> BM cells after Glutamine treatment expressed as a histogram (n = 3 independent experiments). (b) *Left*, Representative Seahorse ECAR assessment of *AIF*<sup>+Y</sup> and *AIF*<sup>-Y</sup> BM cells measured in response to sequential addition of Glucose or Glucose+Glutamine (Substrat) and 2-deoxyglucose (2-DG). Arrows indicate the time of the addition of each reagent. Note the absence of response to Glutamine addition and the total inhibition by 2-DG. *Right*, ECAR *AIF*<sup>+Y</sup> and *AIF*<sup>-Y</sup> BM cells after the indicated treatment expressed as a histogram (n = 3 independent experiments). Statistical significance was calculated by Mann Whitney test. Bars represent mean ± SEM.
