# Supplementary material
Source: PubMed Central journal article supplement (PMC5943248)
Supplement: 41418_2017_35_MOESM11_ESM.pdf [file 41418_2017_35_MOESM11_ESM.pdf]

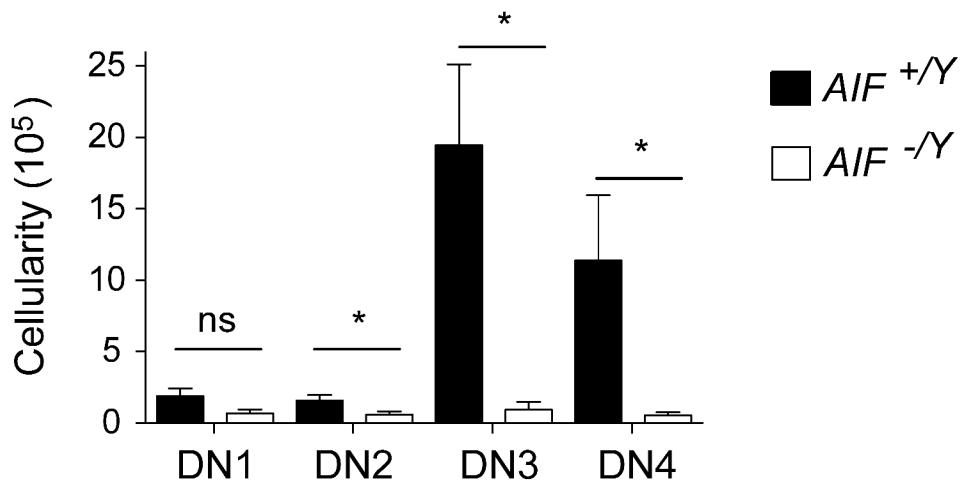

**Supplementary Figure 7. AIF loss induced a significant reduction in DN2, DN3, and DN4 thymocyte subsets .** After a flow cytometry CD4, CD8, CD25, and CD44 labelling, the number of DN1-DN4 thymocytes in 7-day-old *AIF*<sup>+/Y</sup> and *AIF*<sup>-/Y</sup> animals was counted and expressed as a histogram (n = 5 mice per group). Statistical significance was calculated by Mann Whitney test. Bars represent mean ± SEM.
