# Supplementary material
Source: PubMed Central journal article supplement (PMC5943248)
Supplement: 41418_2017_35_MOESM13_ESM.pdf [file 41418_2017_35_MOESM13_ESM.pdf]

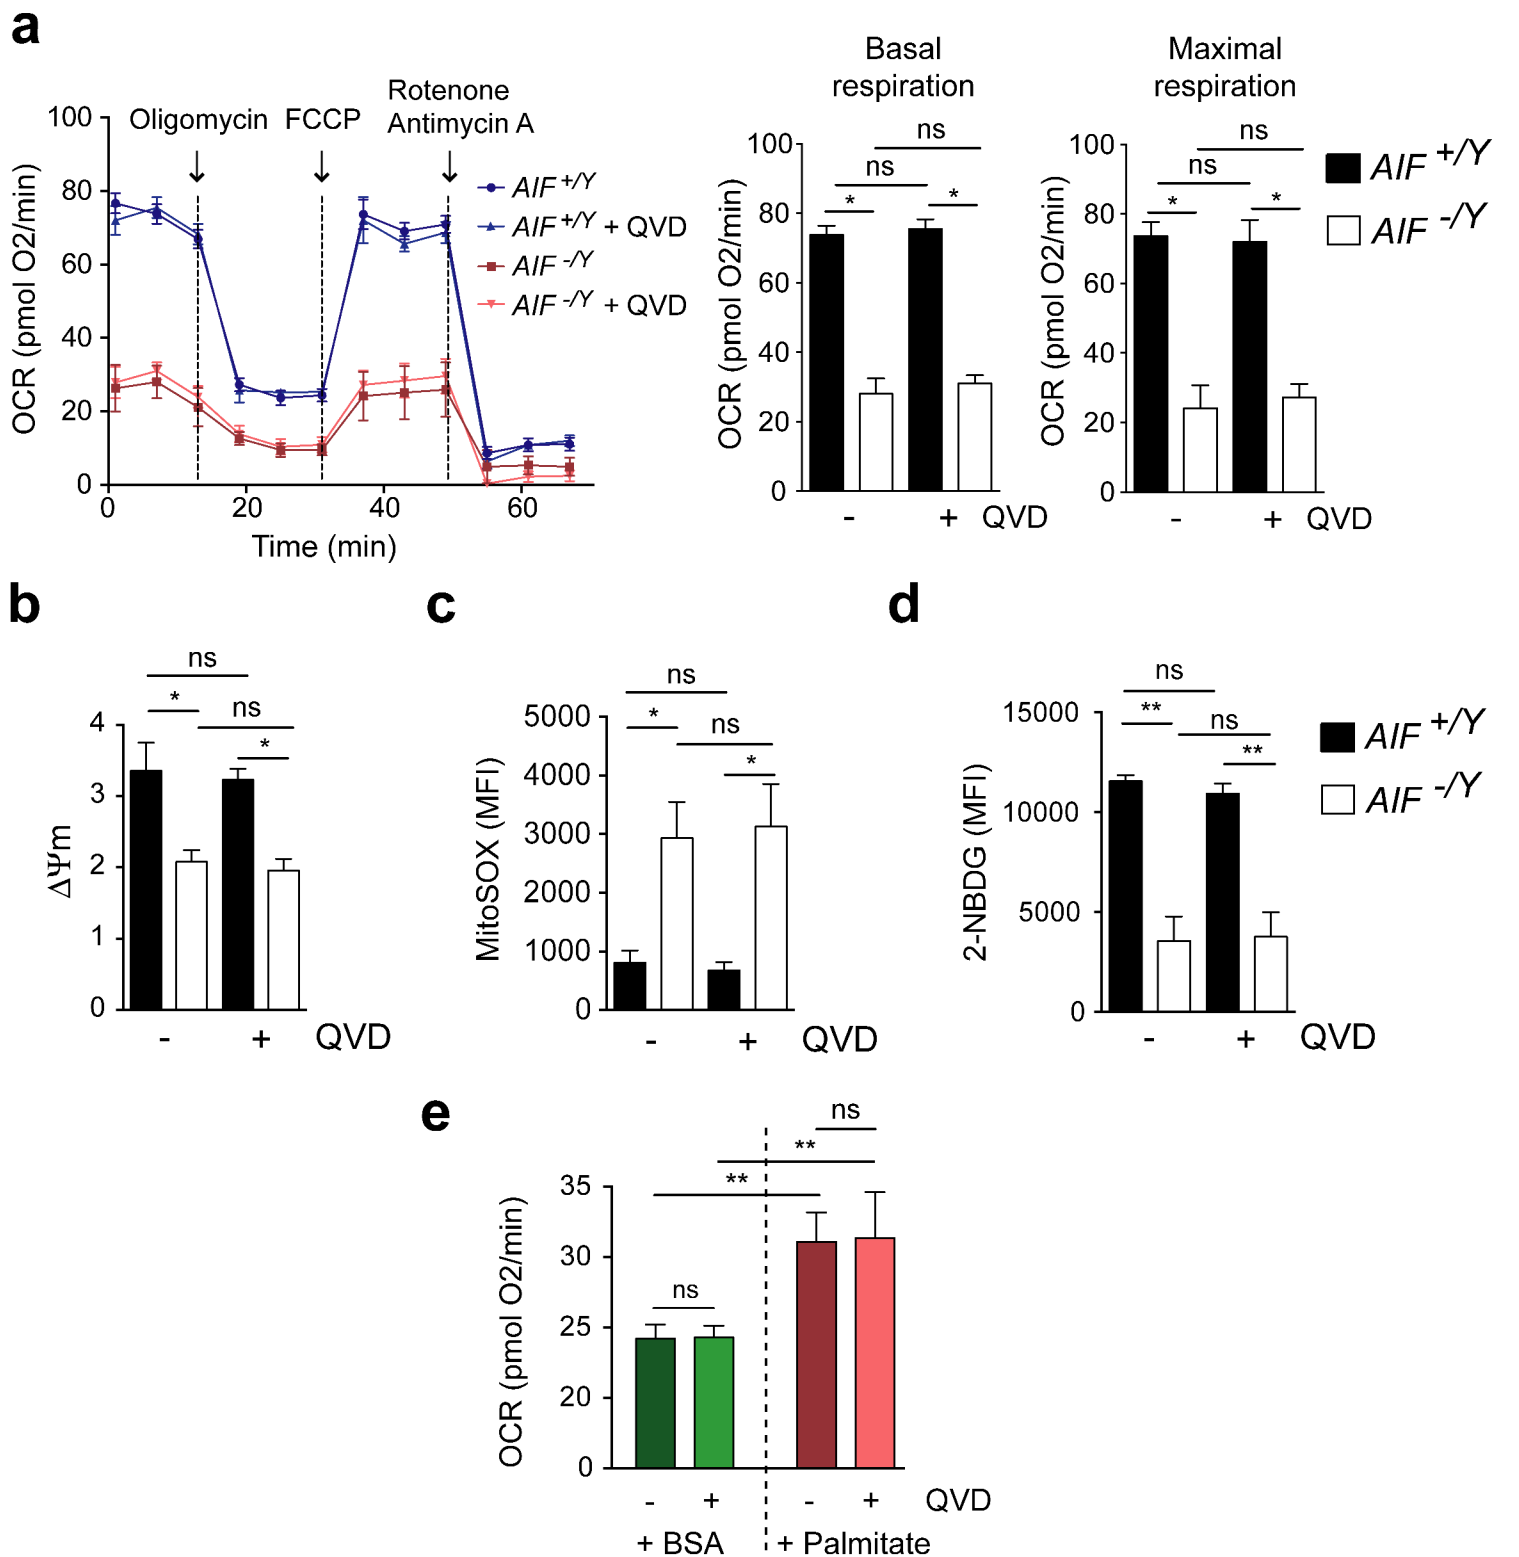

**Supplementary Figure 9. The metabolic changes associated to AIF deficiency in thymocytes are caspase-independent.** (a) *Left*, Representative Seahorse OCR assessment of  $AIF^{+/Y}$  and  $AIF^{-/Y}$  thymocytes pretreated or not during 30 min with the caspase inhibitor Q-VD-OPh (QVD, 1  $\mu$ M) under basal conditions (initial rates) and in response to sequential treatment with Oligomycin, FCCP, and Rotenone/Antimycin A. Arrows indicate the time of the addition of each reagent. *Right*, Basal and maximal OCR of thymocytes  $\pm$  QVD expressed as a histogram ( $n = 3$  independent experiments). (b)  $\Delta\Psi_m$  assessment performed in  $AIF^{+/Y}$  and  $AIF^{-/Y}$  thymocytes  $\pm$  QVD ( $n = 6$  mice per group). (c) Mitochondrial ROS levels recorded in  $AIF^{+/Y}$  and  $AIF^{-/Y}$  thymocytes  $\pm$  QVD ( $n = 4$  mice per group). (d) Glucose uptake measured by the assimilation of 2-NBDG in  $AIF^{+/Y}$  and  $AIF^{-/Y}$  thymocytes  $\pm$  QVD ( $n = 5$  mice per group). (e) Representative Seahorse OCR assessment in thymocytes from  $AIF^{-/Y}$  21-day-old animals pretreated or not with QVD. After measurement of basal OCR, BSA control or Palmitate-BSA FAO Substrate (17  $\mu$ M) were injected and maximal OCR was measured and expressed as a histogram ( $n = 3$  independent experiments). Statistical significance was calculated by Mann Whitney test. Bars represent mean  $\pm$  SEM. All tests were performed in thymocytes from 21-day-old animals.
