# Supplementary material
Source: PubMed Central journal article supplement (PMC5943248)
Supplement: 41418_2017_35_MOESM14_ESM.pdf [file 41418_2017_35_MOESM14_ESM.pdf]

**a**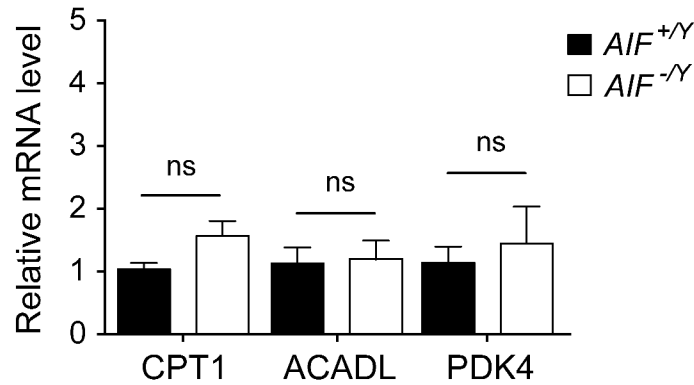**b**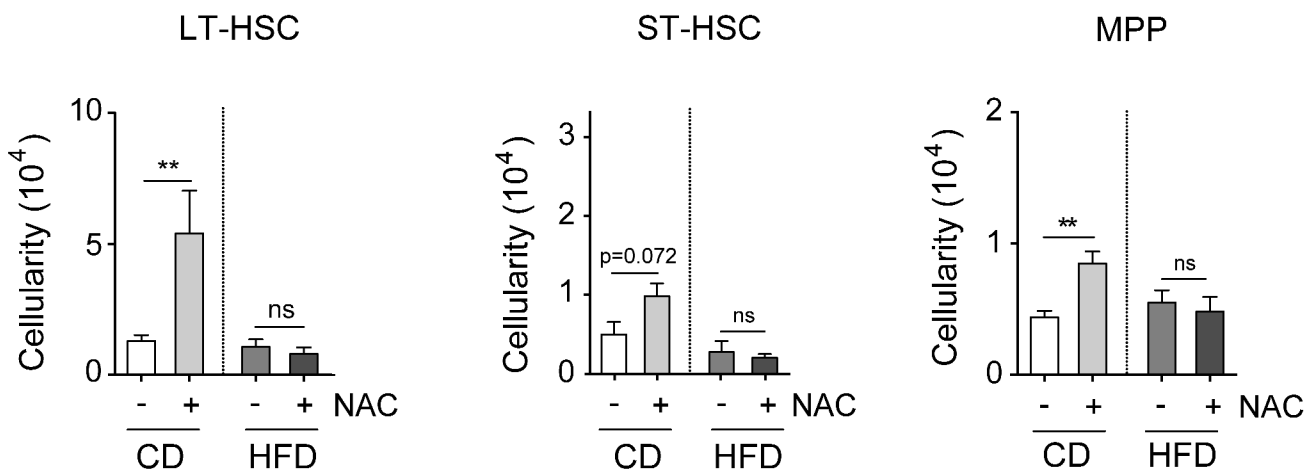

**Supplementary Figure 10. *AIF*<sup>-/-</sup> HSC and MPP were unable to shift towards a fatty acid metabolism.** (a) CPT1, ACADL, and PDK4 mRNA levels determined by quantitative RT-PCR in *AIF*<sup>+/-</sup> and *AIF*<sup>-/-</sup> BM cells from 21-day-old animals (n = 4 mice per group). The 18S mRNA expression was used to normalize the data. (b) Dams were fed a standard control diet (CD) or high-fat diet (HFD) and were supplied or not with NAC in drinking water; the number of LT-HSC, ST-HSC, and MPP cells from *AIF*<sup>-/-</sup> 21-day-old newborns was counted and expressed as a histogram (n = 8 mice per group). Statistical significance was calculated by Mann Whitney test. Bars represent mean ± SEM.
